# Supplementary material for: Synthesis and ligand substitution reactions of κ4-B,S,S′,S′′-ruthenaboratranes
Source: Royal Society of Chemistry journal article supplement (doi:10.1039/c8dt04278k), 2018-11-26
Supplement: c8dt04278k1.pdf [file c8dt04278k1.pdf]

## Synthesis and Ligand Substitution Reactions of $\kappa^4$ -B,S,S',S''-Ruthenaboratranes

Mark R. St.-J. Foreman, Anthony F. Hill,\* Chenxi Ma, Never Tshabang and Andrew J. P. White.

Supporting Information

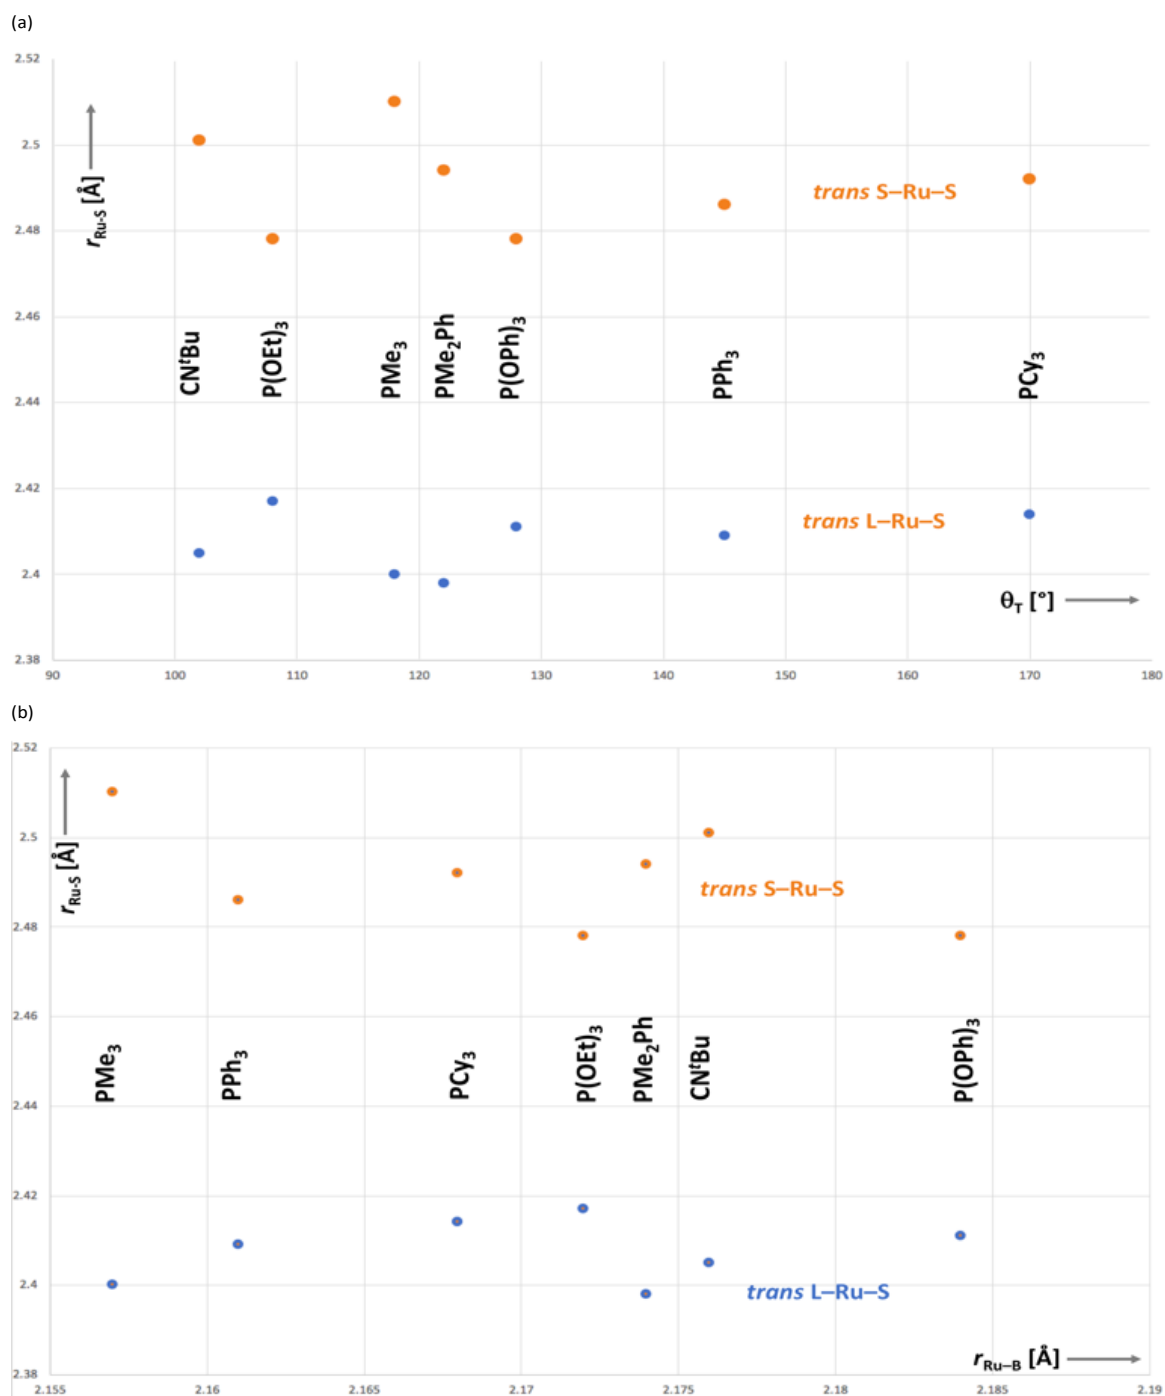

**Chart S1.** Lack of correlation between Ru-S bond lengths and (a)  $\theta_T$ ; (b)  $r_{Ru-B}$ .
